# Supplementary material
Source: Springer Nature journal article supplement (https://www.springermedizin.de/resource/supplementary/13221_2011_20_MOESM2_ESM.pdf/9680784)

A

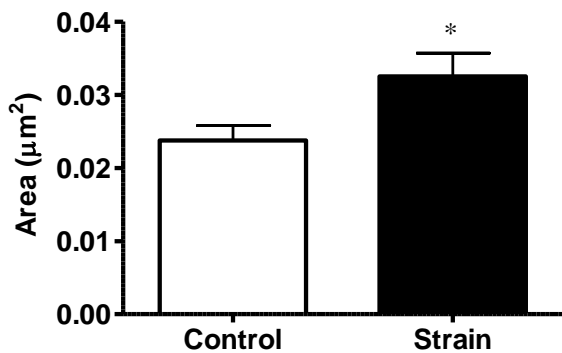

B

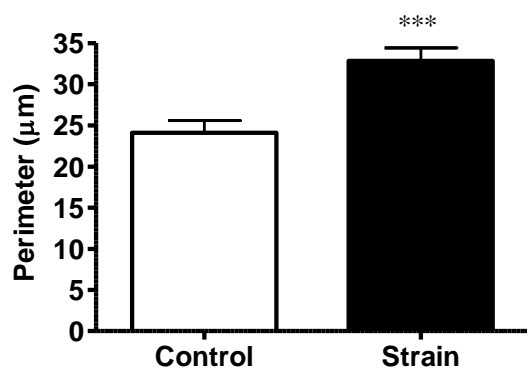

C

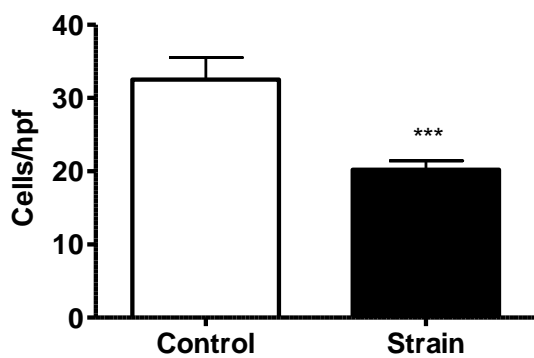

D

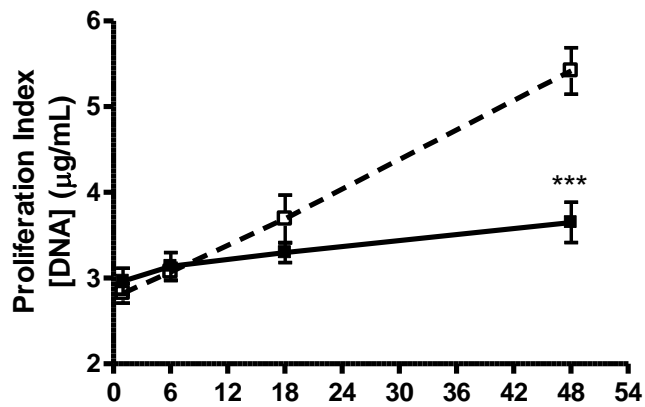

E

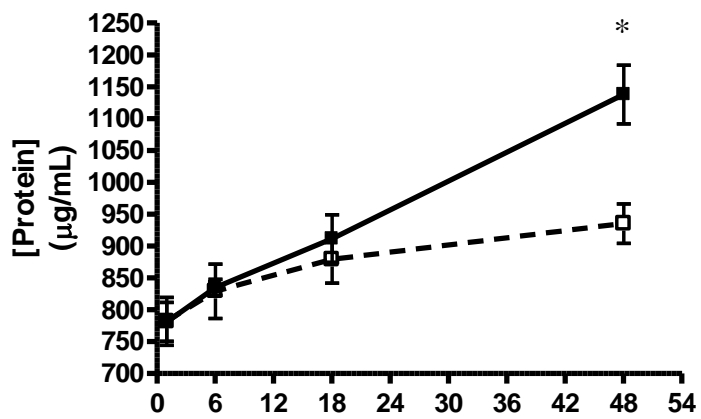

F

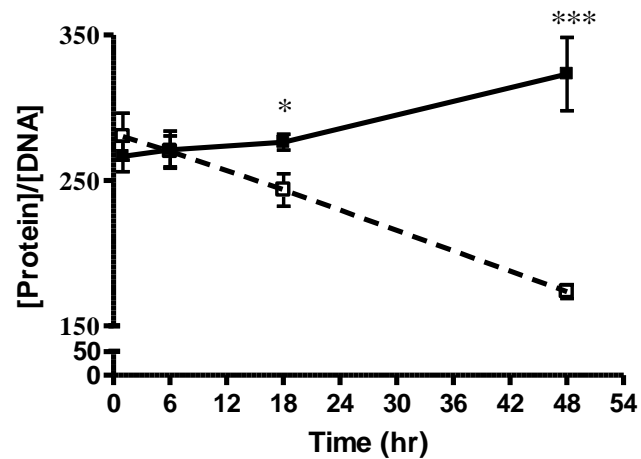

Supplement: MOESM2 [file 9680784]
